# Supplementary material for: RNA-seq analysis identified glucose-responsive genes and YqfO as a global regulator in Bacillus subtilis
Source: PubMed Central journal article supplement (PMC8670212; doi:10.1186/s13104-021-05869-1), 2021-12-14
Supplement: 13104_2021_5869_MOESM3_ESM.pdf [file 13104_2021_5869_MOESM3_ESM.pdf]

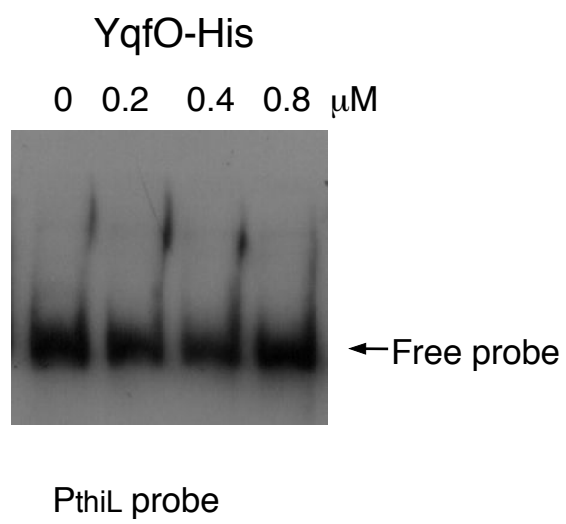

Fig. S1
